# Supplementary material
Source: Copernicus journal article supplement (doi:10.5194/egqsj-33-59-1983)

Figure 7: Position of the Eltville tuff layer in the C. B. R. quarry near Lixhe.

7A: SSW-NNE cross-section of a dry valley with the Eltville tuff.

7B: Detailed profile of the undisturbed Eltville tuff layer.

7C: Detailed profile of the disturbed Eltville tuff layer (cryotubated).

7D: Detailed profile of the disturbed Eltville tuff layer (soliflucted).

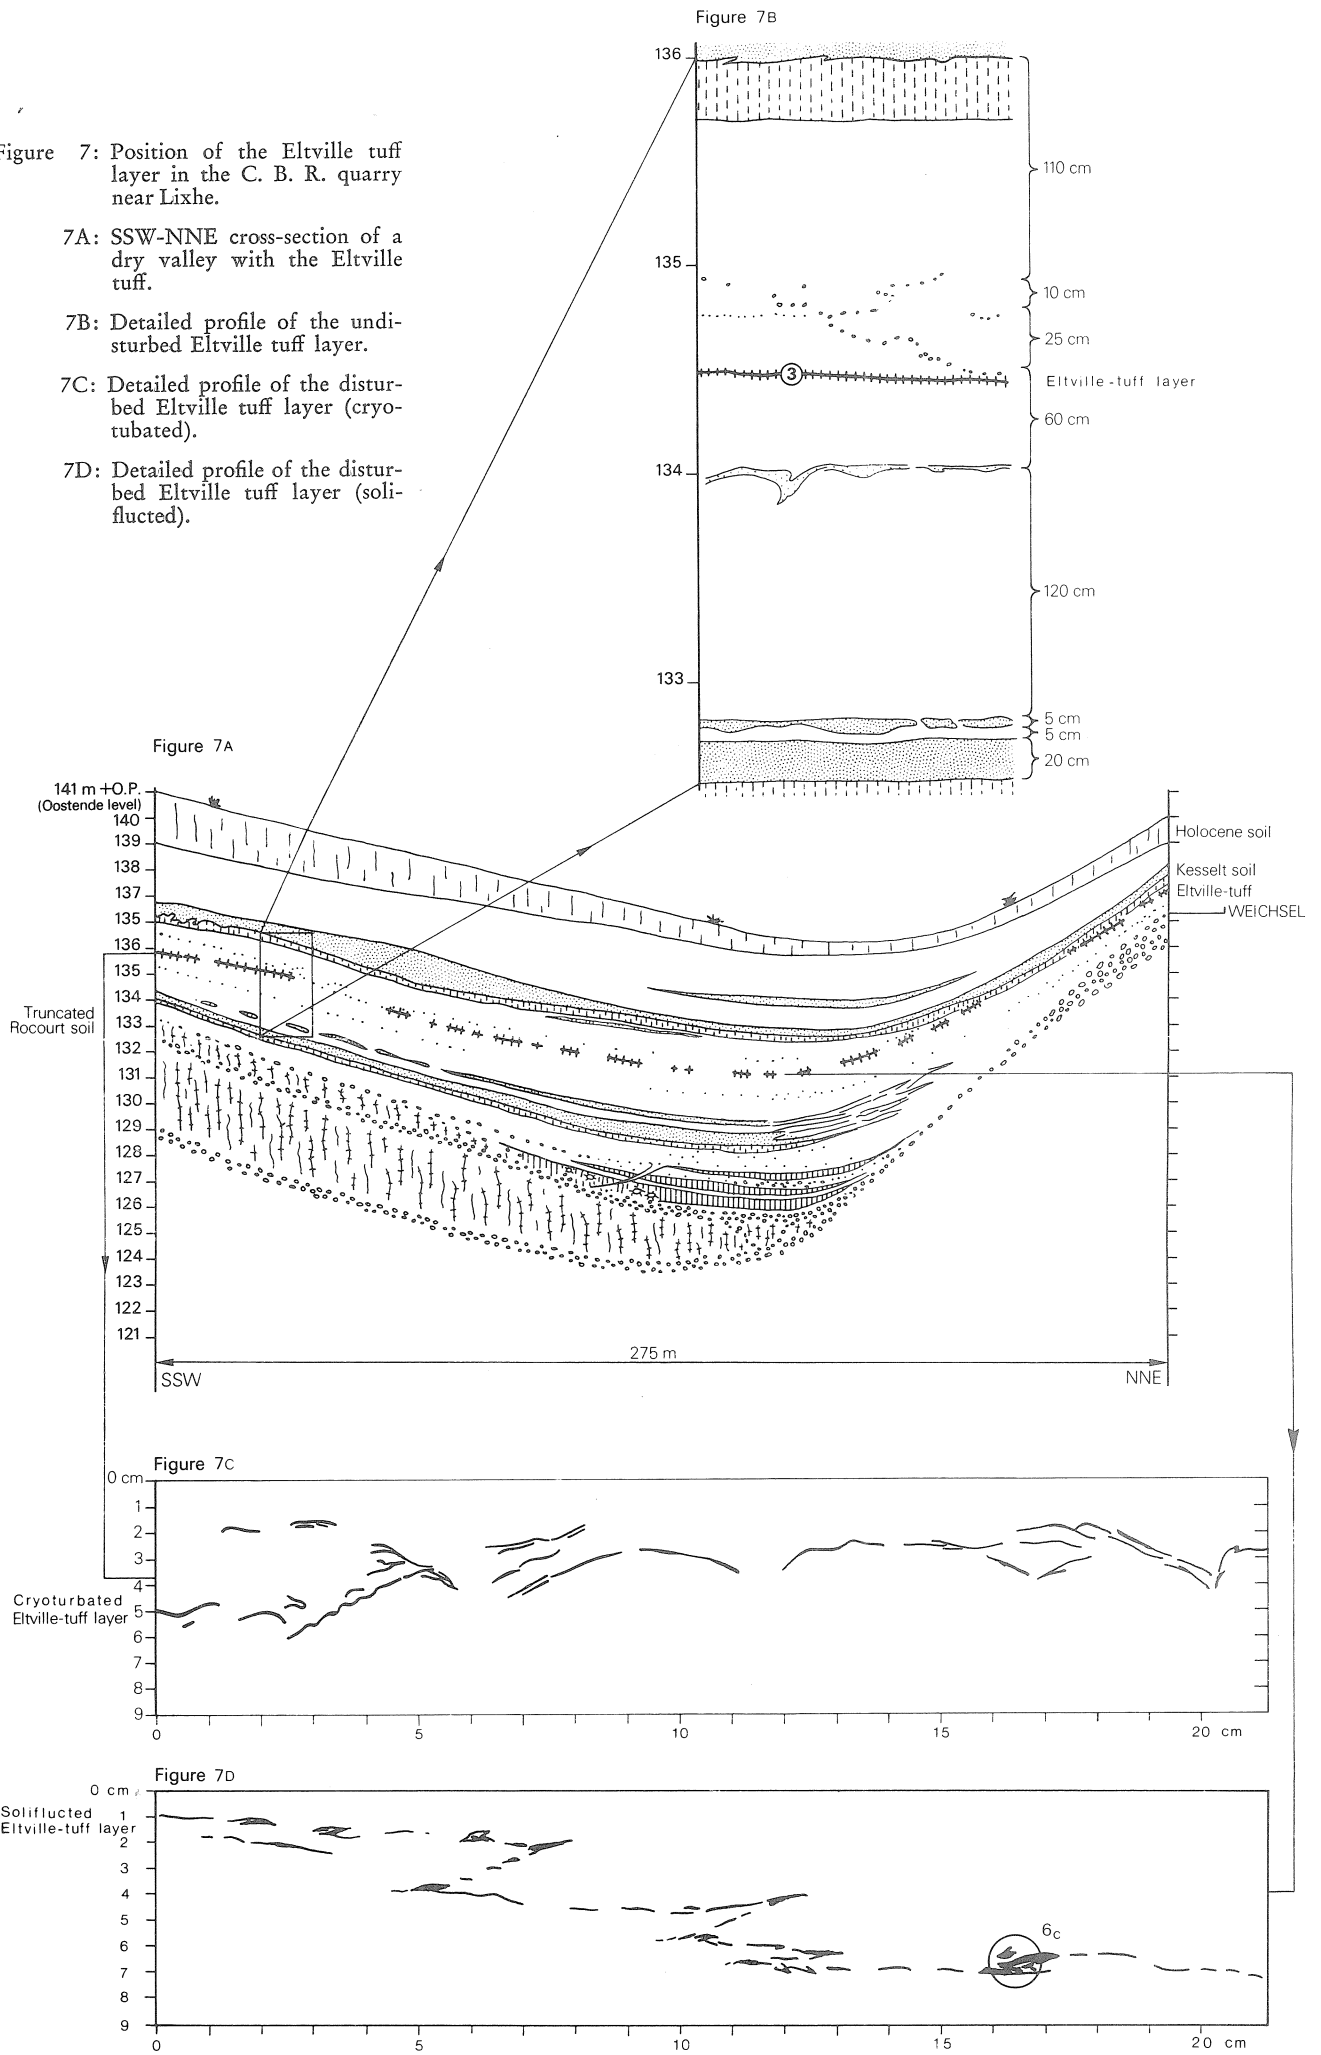

Figure 7B

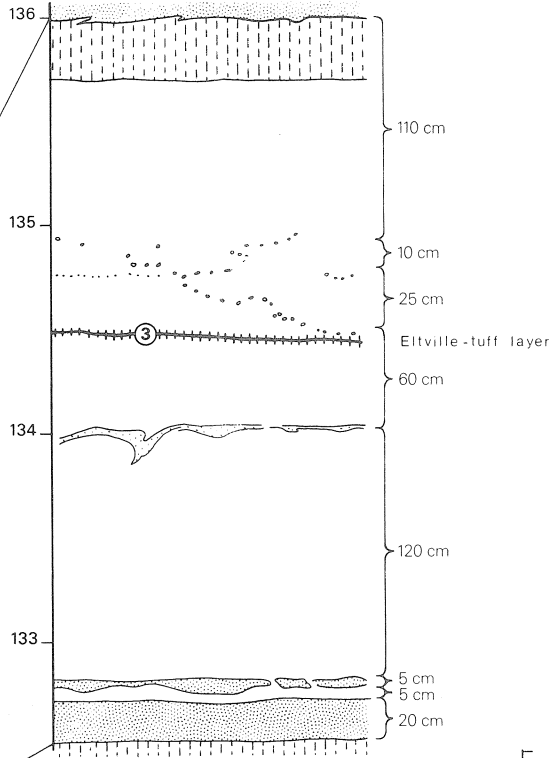

Figure 7A

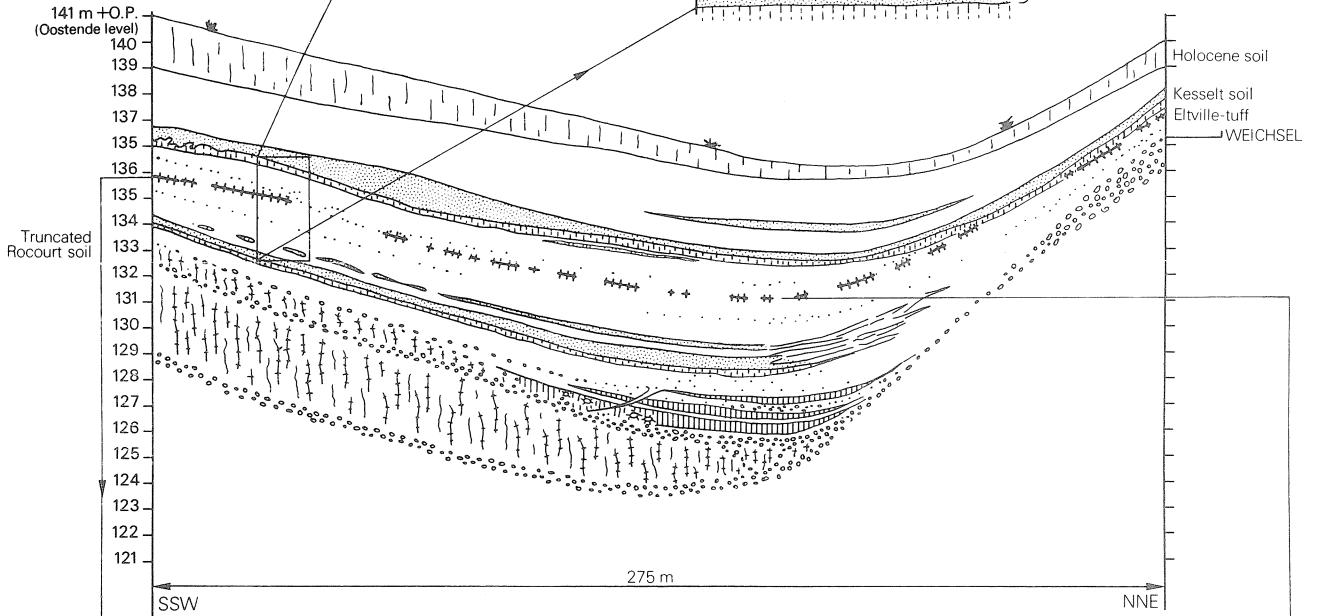

Figure 7C

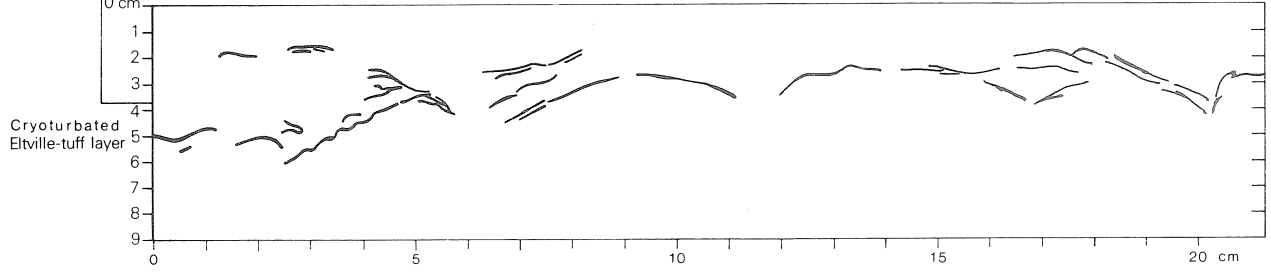

Figure 7D

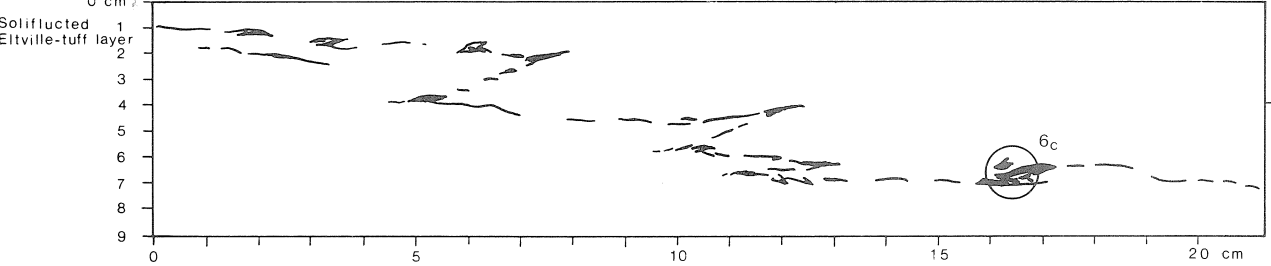

Supplement: Supplementary file 1 [file egqsj-33-59-1983-supplement.pdf]
